# Supplementary material for: Near-membrane ensemble elongation in the proline-rich LRP6 intracellular domain may explain the mysterious initiation of the Wnt signaling pathway
Source: PubMed Central journal article supplement (PMC3278829; doi:10.1186/1471-2105-12-s13-s13), 2011-11-30
Supplement: 1471-2105-12-S13-S13-S1.pdf [file 1471-2105-12-S13-S13-S1.pdf]

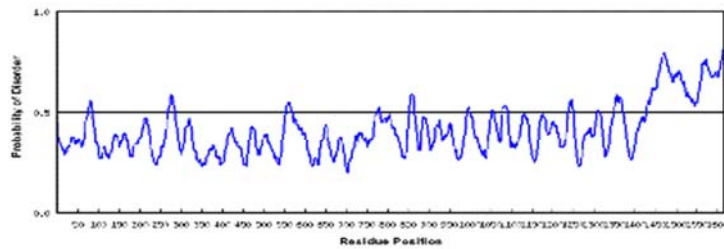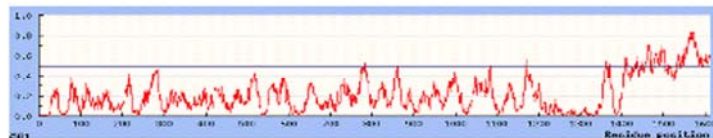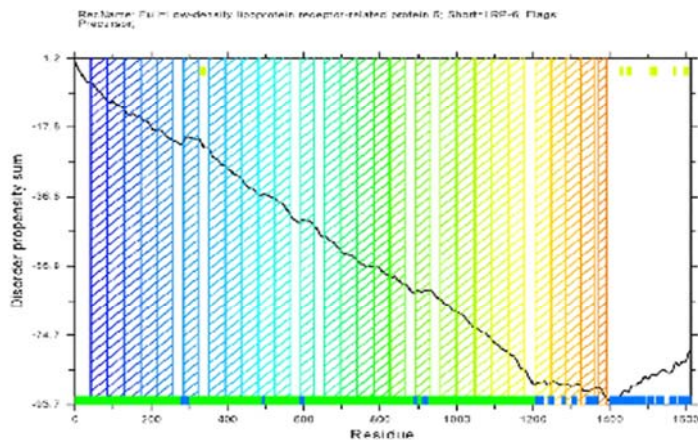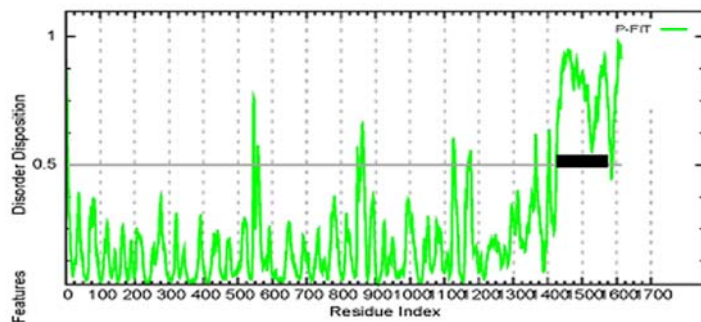

FoldIndex of LRP6

Region 1486-1613 is predicted as unfolded (red label).

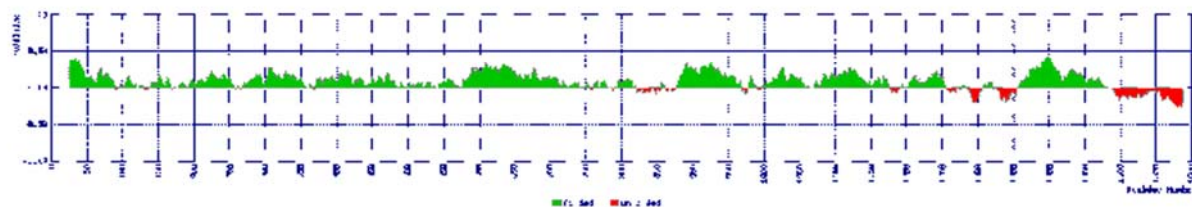

**Figure S1- Analysis of the human LRP6 protein [Swiss-Prot:O75581] using different predictors.**

The graphical output of each method and the corresponding interpretation is shown. The precise boundaries of ordered and disordered regions were derived from the corresponding text output (not shown). The intracellular domain is unfolded, whereas the extracellular domain is folded/ structured.
