# Supplementary material for: Near-membrane ensemble elongation in the proline-rich LRP6 intracellular domain may explain the mysterious initiation of the Wnt signaling pathway
Source: PubMed Central journal article supplement (PMC3278829; doi:10.1186/1471-2105-12-s13-s13), 2011-11-30
Supplement: 1471-2105-12-S13-S13-S2.pdf [file 1471-2105-12-S13-S13-S2.pdf]

## LRP6 ITD

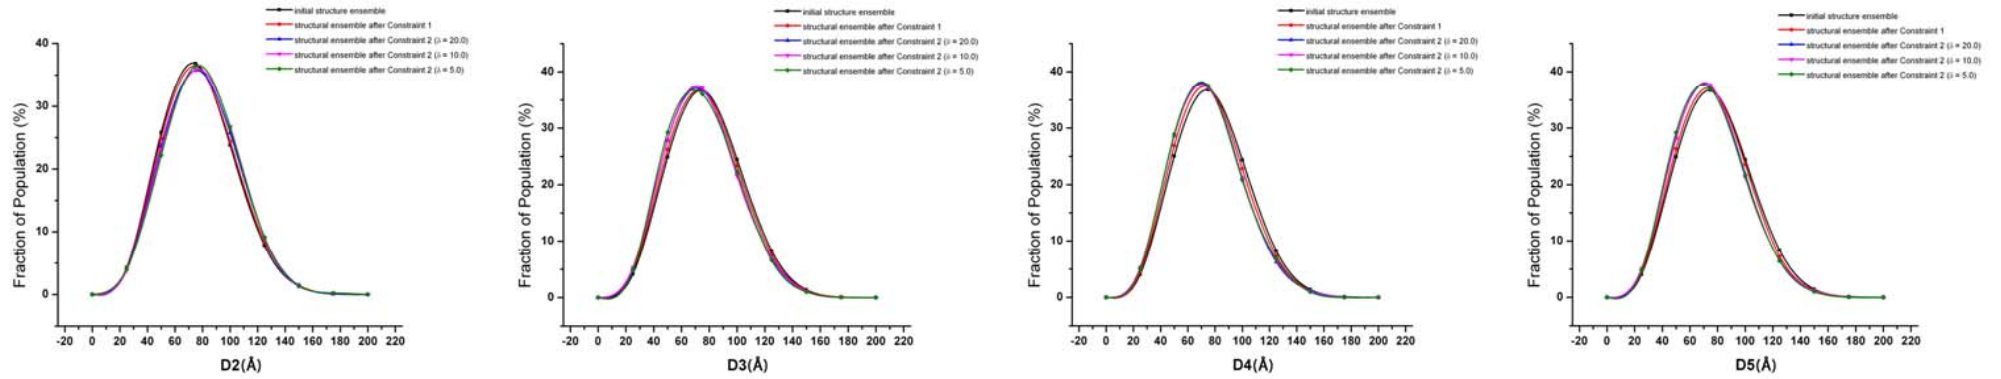

## Control Sequence

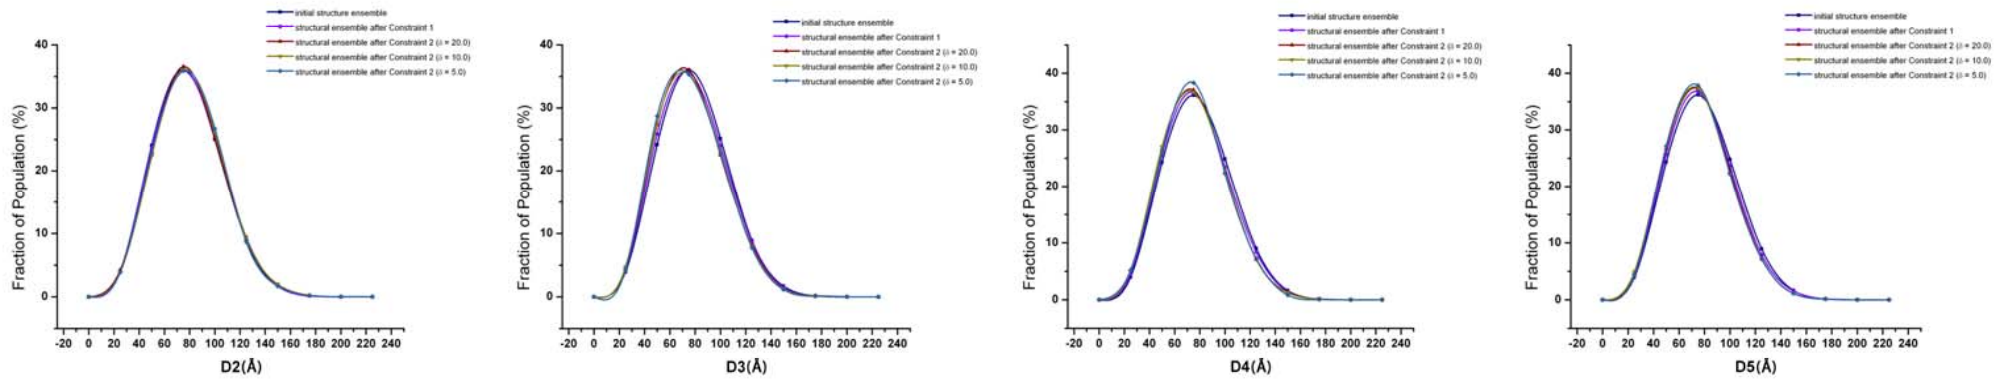

**Figure S2-End-to-end distance distributions of D2 to D5 for LRP6 intracellular domain and control sequence.**

The upper panel displays the D2 to D5 distributions for LRP6 intracellular domain at  $\delta$  set to 20.0Å, 10.0Å, and 5.0Å. The lower panel displays the D2 to D5 distributions for control sequence at  $\delta$  set to 20.0Å, 10.0Å, and 5.0Å.
