# Supplementary material for: Near-membrane ensemble elongation in the proline-rich LRP6 intracellular domain may explain the mysterious initiation of the Wnt signaling pathway
Source: PubMed Central journal article supplement (PMC3278829; doi:10.1186/1471-2105-12-s13-s13), 2011-11-30
Supplement: 1471-2105-12-S13-S13-S4.pdf [file 1471-2105-12-S13-S13-S4.pdf]

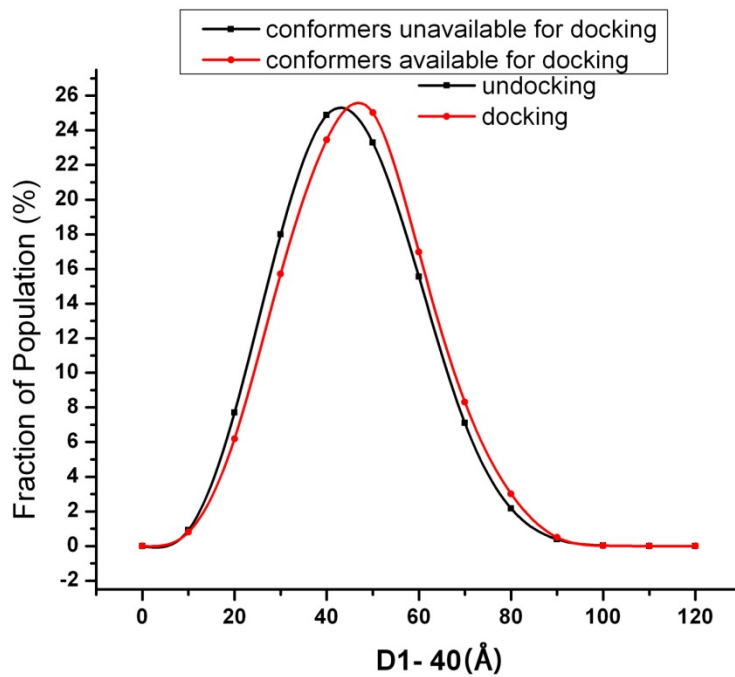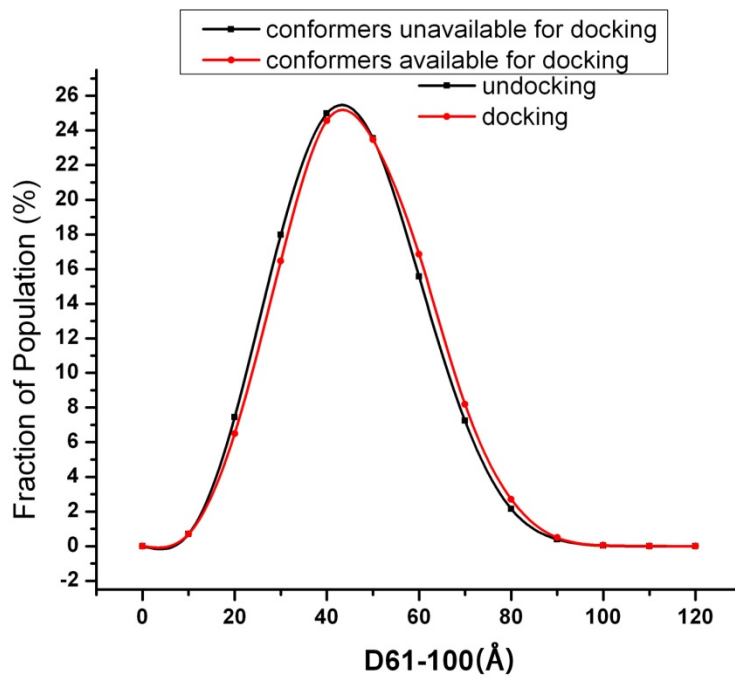

**Figure S3-End-to-end distance distributions of D1-40 and D61-100 for the constructed 100mer peptide.**

The two graphs display the end-to-end distributions of D1-40 and D61-100 for the constructed 100mer peptide.
