# Supplementary material for: Near-membrane ensemble elongation in the proline-rich LRP6 intracellular domain may explain the mysterious initiation of the Wnt signaling pathway
Source: PubMed Central journal article supplement (PMC3278829; doi:10.1186/1471-2105-12-s13-s13), 2011-11-30
Supplement: 1471-2105-12-S13-S13-S5.pdf [file 1471-2105-12-S13-S13-S5.pdf]

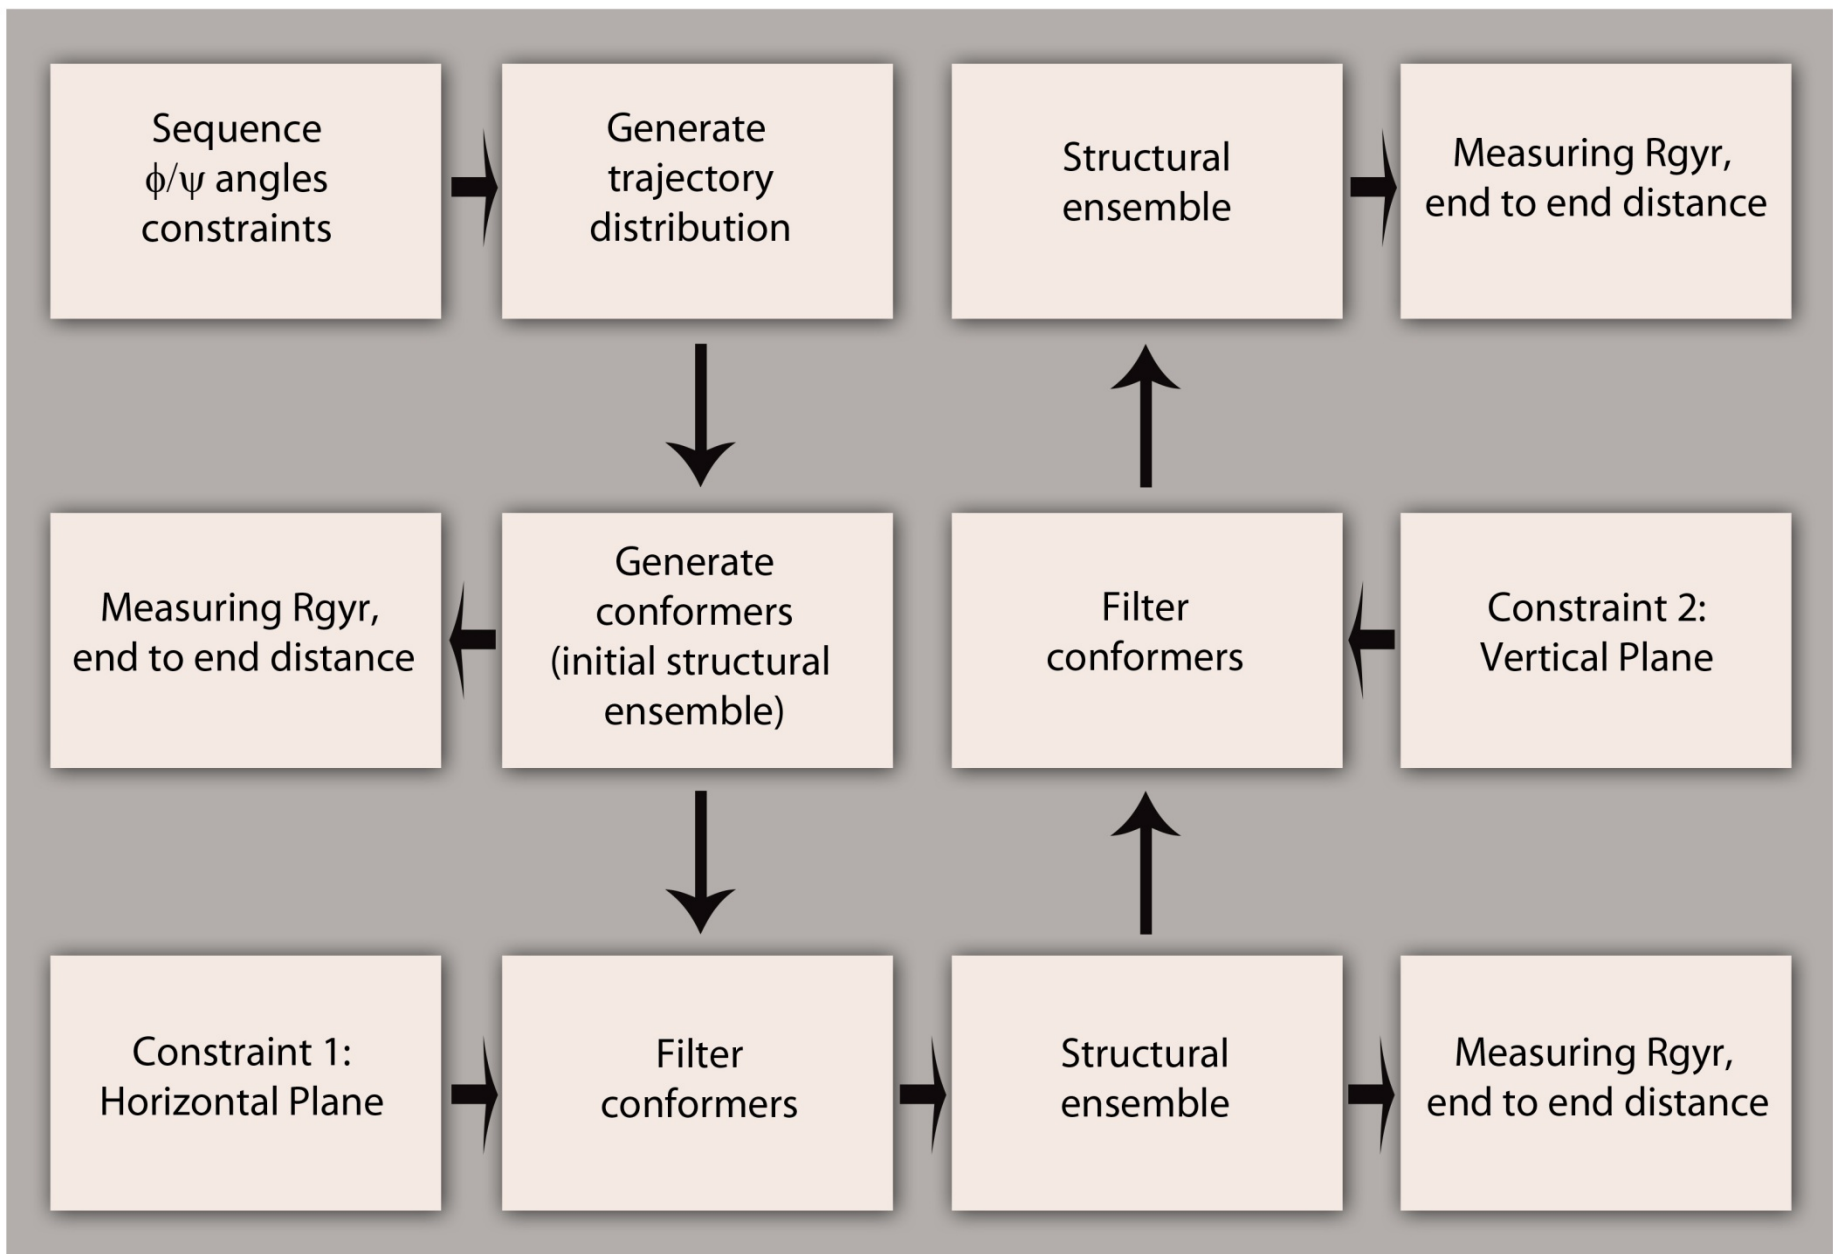

Figure S4-Flow chart of the simulation process on LRP6 intracellular domain.
